# Supplementary figures and images for: Theoretical infrared spectroscopy of protonated methane isotopologues
Source: Royal Society of Chemistry journal article supplement (doi:10.1039/d4cp02295e), 2024-01-01

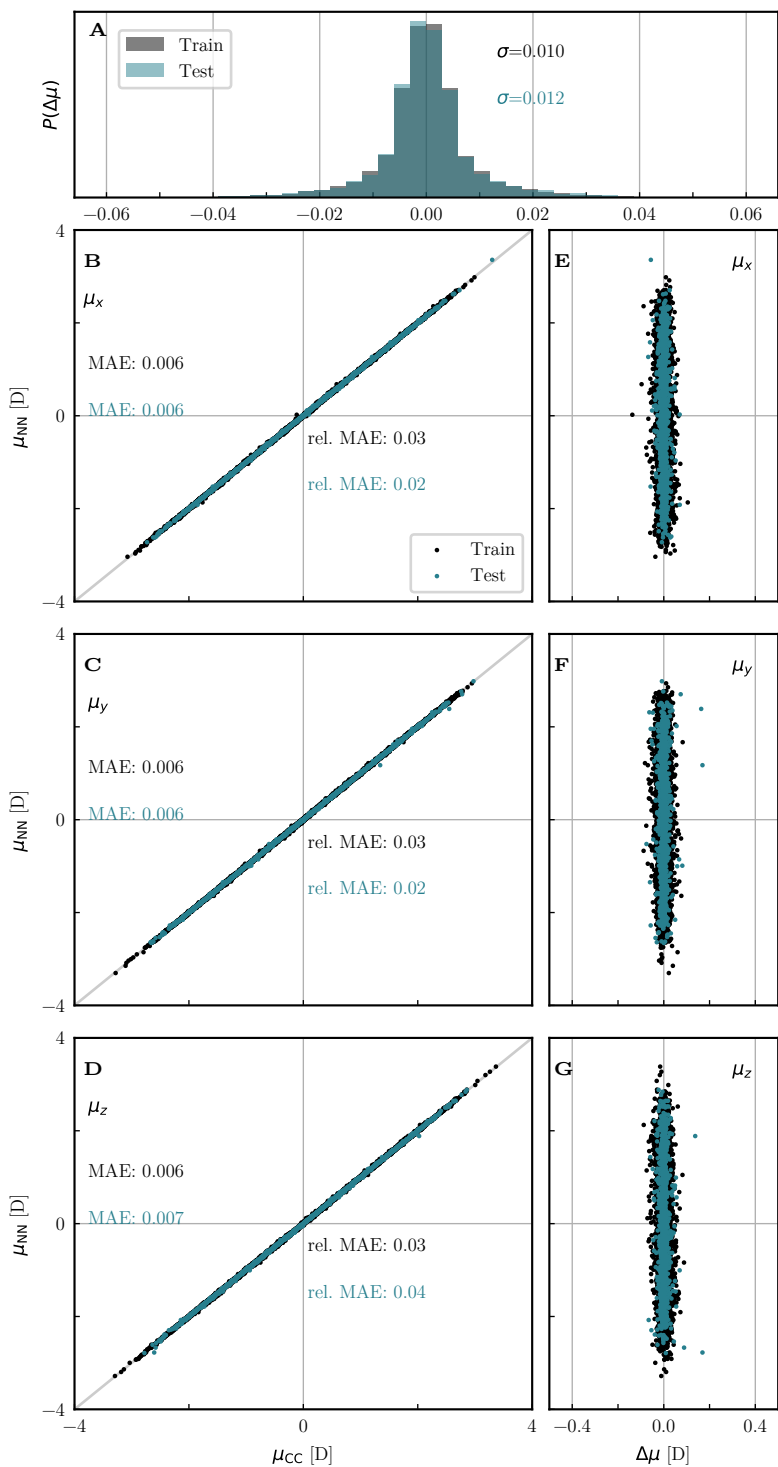

Supplement: d4cp02295e1.zip [file d4cp02295e1.zip]
